1 A novel toxin-antitoxin module SlvT–SlvA governs  
2 megaplasmid stability and incites solvent tolerance in  
3 *Pseudomonas putida* S12  
4

5 Hadiastri Kusumawardhani, David van Dijk, Rohola Hosseini, Johannes H. de Winde\*

6 Institute of Biology Leiden, Leiden University, The Netherlands

7 \*Correspondence: [j.h.de.winde@biology.leidenuniv.nl](mailto:j.h.de.winde@biology.leidenuniv.nl)

8

9 Keywords:

10 Genome engineering, RND efflux pump, Toxin-antitoxin, Megaplasmid, Solvent tolerance, Industrial  
11 biotechnology.

12 **Abstract**

13 *Pseudomonas putida* S12 is highly tolerant towards organic solvents in saturating concentrations,  
14 rendering this microorganism suitable for the industrial production of various aromatic compounds.  
15 Previous studies reveal that *P. putida* S12 contains a single-copy 583 kbp megaplasmid pTTS12. This  
16 pTTS12 encodes several important operons and gene clusters facilitating *P. putida* S12 to survive and  
17 grow in the presence of toxic compounds or other environmental stresses. We wished to revisit and  
18 further scrutinize the role of pTTS12 in conferring solvent tolerance. To this end, we cured the  
19 megaplasmid from *P. putida* S12 and conclusively confirmed that the SrpABC efflux pump is the major  
20 contributor of solvent tolerance on the megaplasmid pTTS12. Importantly, we identified a novel toxin-  
21 antitoxin module (proposed gene names *slvT* and *slvA* respectively) encoded on pTTS12 which  
22 contributes to the solvent tolerant phenotype and is essential in conferring genetic stability to the  
23 megaplasmid. Chromosomal introduction of the *srp* operon in combination with *slvAT* gene pair  
24 created a solvent tolerance phenotype in non-solvent tolerant strains such as *P. putida* KT2440, *E. coli*  
25 TG1, and *E. coli* BL21(DE3).

## 26 **Importance**

27 Sustainable alternatives for high-value chemicals can be achieved by using renewable feedstocks in  
28 bacterial biocatalysis. However, during bioproduction of such chemicals and biopolymers, aromatic  
29 compounds that function as products, substrates or intermediates in the production process may  
30 exert toxicity to microbial host cells and limit the production yield. Therefore, solvent-tolerance is a  
31 highly preferable trait for microbial hosts in the biobased production of aromatic chemicals and  
32 biopolymers. In this study, we revisit the essential role of megaplasmid pTTS12 from solvent-tolerant  
33 *P. putida* S12 for molecular adaptation to organic solvent. In addition to the RND efflux pump  
34 (SrpABC), we identified a novel toxin-antitoxin module (SlvAT) which contributes to tolerance in low  
35 solvent concentration as well as to genetic stability of pTTS12. These two gene clusters were  
36 successfully transferred to non-solvent tolerant strains of *P. putida* and to *E. coli* strains to confer and  
37 enhance solvent tolerance.

38

## 39 Introduction

40 One of the main problems in the production of aromatic compounds is chemical stress caused by the  
41 added substrates, pathway intermediates, or products. These chemicals, often exhibiting  
42 characteristics of organic solvents, are toxic to microbial hosts and may negatively impact product  
43 yields. They adhere to the cell membranes, alter membrane permeability, and cause membrane  
44 damage (1, 2). *Pseudomonas putida* S12 exhibits exceptional solvent tolerance characteristics,  
45 enabling this strain to withstand toxic organic solvents in saturating concentrations (3, 4).  
46 Consequently, a growing list of valuable compounds has successfully been produced using *P. putida*  
47 S12 as a biocatalyst by exploiting its solvent tolerance (5–9).

48 Following the completion of its full genome sequence and subsequent transcriptome and  
49 proteome analyses, several genes have been identified that may play important roles in controlling  
50 and maintaining solvent tolerance of *P. putida* S12 (10–12). As previously reported, an important  
51 solvent tolerance trait of *P. putida* S12 is conferred through the RND-family efflux pump, SrpABC,  
52 which actively removes organic solvent molecules from the cells (13, 14). Initial attempts to  
53 heterologously express the SrpABC efflux pump in *E. coli* enabled instigation of solvent-tolerance and  
54 production of 1-naphtol (15, 16). Importantly, the SrpABC efflux pump is encoded on the megaplasmid  
55 pTTS12 of *P. putida* S12 (12).

56 The 583 kbp megaplasmid pTTS12 is a stable single-copy plasmid specific to *P. putida* S12 (12).  
57 It encodes several important operons and gene clusters enabling *P. putida* S12 to tolerate, resist and  
58 survive the presence of various toxic compounds or otherwise harsh environmental conditions.  
59 Interesting examples are the presence of a complete styrene degradation pathway gene cluster, the  
60 RND efflux pump specialized for organic solvents (SrpABC) and several gene clusters conferring heavy  
61 metal resistance (12, 17, 18). In addition, through analysis using TADB2.0 (19, 20) pTTS12 is predicted  
62 to contain three toxin-antitoxin modules. Toxin-antitoxin modules recently have been recognized as  
63 important determinants of resistance towards various stress conditions (21, 22). Toxin-antitoxin  
64 modules identified in pTTS12 consist of an uncharacterized RPPX\_26255 - RPPX\_26260 system and

65 two identical copies of a VapBC system (23). RPPX\_26255 and RPPX\_26260 belong to a newly  
66 characterized type II toxin-antitoxin pair COG5654-COG5642. While toxin-antitoxin systems are  
67 known to preserve plasmid stability through post-segregational killing of plasmid-free daughter cells  
68 (24), RPPX\_26255-RPPX\_26260 was also previously shown to be upregulated during organic solvent  
69 exposure indicating its role in solvent tolerance (11).

70 In this paper, we further address the role of pTTS12 in conferring solvent tolerance of *P. putida*  
71 S12. Curing pTTS12 from its host strain caused a significant reduction in solvent tolerance, while  
72 complementation of the cured strain with the *srp* operon significantly restored solvent tolerance,  
73 underscoring the importance of the SrpABC solvent pump in conferring solvent tolerance in *P. putida*  
74 S12. In addition, we showed that the novel toxin-antitoxin pair *slvAT* (RPPX\_26260 and RPPX\_26255)  
75 is essential for maintaining genetic stability of megaplasmid pTSS12. We further modelled SlvT and  
76 SlvA to the recently characterised crystal structure of McbT and McbA from *Mycobacterium*  
77 *tuberculosis* (25). We clearly show that SlvT causes toxicity by degrading NAD<sup>+</sup> in *E. coli* BL21 (DE3),  
78 similar to recently characterized toxins of the COG5654 family (25–27). Importantly, introduction of  
79 the *srp* operon in combination with toxin-antitoxin pair *slvAT* in non-solvent tolerant *P. putida* KT2440  
80 as well as *E. coli* confers and enhances solvent tolerance in these strains.

81

## 82 Results

### 83 Megaplasmid pTTS12 is essential for solvent tolerance in *P. putida* S12

84 To further analyze the role of the megaplasmid of *P. putida* S12 in solvent tolerance, pTTS12 was  
85 removed from *P. putida* S12 using mitomycin C. This method was selected due to its reported  
86 effectivity in removing plasmids from *Pseudomonas* sp. (28), although previous attempts regarded  
87 plasmids that were significantly smaller in size than pTTS12 (29). After treatment with mitomycin C  
88 (10-50 mg L<sup>-1</sup>), liquid cultures were plated on M9 minimal media supplemented with indole to select  
89 for plasmid-cured colonies. Megaplasmid pTTS12 encodes two key enzymes: Styrene monooxygenase  
90 (SMO) and Styrene oxide isomerase (SOI), that are responsible for the formation of indigo coloration  
91 from indole. This conversion results in indigo coloration in spot assays for wildtype *P. putida* S12  
92 whereas white colonies are formed in the absence of megaplasmid pTTS12. With the removal of  
93 pTTS12, loss of indigo coloration and hence, of indigo conversion was observed in all three plasmid-  
94 cured strains and the negative control *P. putida* KT2440 (Figure 1A).

95 With mitomycin C concentration of 30 mg L<sup>-1</sup>, 3 out of 122 obtained colonies appeared to be  
96 completely cured from the megaplasmid, underscoring the high genetic stability of the plasmid. No  
97 colonies survived the addition of 40 and 50 mg L<sup>-1</sup> of mitomycin C, whereas all the colonies that  
98 survived the addition of 10 and 20 mg L<sup>-1</sup> of mitomycin C retained the megaplasmid. All three  
99 independent colonies cured from the megaplasmid were isolated as *P. putida* S12-6, *P. putida* S12-10,  
100 and *P. putida* S12-22. Complete loss of the megaplasmid was further confirmed by phenotypic analysis  
101 (Figure 1), and by full genome sequencing. Several operons involved in heavy metal resistance were  
102 previously reported in the pTTS12 (12). The *terZABCD* operon contributes to tellurite resistance in  
103 wildtype *P. putida* S12 with minimum inhibitory concentration (MIC) as high as 200 mg L<sup>-1</sup> (Figure 1B).  
104 In the megaplasmid-cured strains, severe reduction of tellurite resistance was observed, decreasing  
105 the potassium tellurite MIC to 50 mg L<sup>-1</sup> (Figure 1B).

106 Genomic DNA sequencing confirmed complete loss of pTTS12 from *P. putida* strains S12-6,  
107 S12-10, and S12-22 without any plasmid-derived fragment putatively being inserted within the

108 chromosome. Complementation of pTTS12 into the plasmid-cured *P. putida* S12 strains restored the  
109 indole-indigo transformation and high tellurite resistance to the similar level with wildtype strain  
110 (Figure S1). Repeated megaplasmid curing experiments indicated that *P. putida* S12 can survive the  
111 addition of 30 mg L<sup>-1</sup> Mitomycin C with the frequency of 2.48 (± 0.58) x 10<sup>-8</sup>. Among these survivors,  
112 only 2% colony population lost the megaplasmid, confirming the genetic stability of pTTS12. In  
113 addition, other plasmid-curing attempt by introducing double strand break as described by Wynands  
114 and colleagues (30) was not successful due to the pTTS12 stability.

115 Growth comparison in solid and liquid culture in the presence of toluene was performed to  
116 analyze the effect of megaplasmid curing in constituting solvent tolerance trait of *P. putida* S12. In  
117 contrast with wildtype *P. putida* S12, the plasmid-cured strains were unable to grow under toluene  
118 atmosphere. In liquid LB medium, plasmid-cured *P. putida* S12 strains were able to tolerate a  
119 maximum of 0.15% v/v toluene, whereas the wildtype *P. putida* S12 can grow in the presence of 0.30%  
120 v/v toluene (Figure 2). In the megaplasmid-complemented *P. putida* S12-C strains, solvent tolerance  
121 was restored to the wildtype level (Figure S1-D). Hence, absence of megaplasmid pTTS12 caused a  
122 significant reduction of solvent tolerance in *P. putida* S12. We chose *P. putida* S12-6 for further  
123 experiments representing megaplasmid-cured *P. putida* S12.

124

### 125 **The SrpABC efflux pump and gene pair RPPX\_26255-26260 are the main constituents of solvent** 126 **tolerance encoded on pTTS12**

127 The significant reduction of solvent-tolerance in plasmid-cured *P. putida* S12 underscored the  
128 important role of megaplasmid pTTS12 in solvent-tolerance. Besides encoding the efflux pump SrpABC  
129 enabling efficient intermembrane solvent removal (12, 13), pTTS12 encodes more than 600 genes and  
130 hence, may contain multiple additionally solvent-tolerance related genes. Two adjacent hypothetical  
131 proteins, RPPX\_26255 and RPPX\_26260, encoded on the megaplasmid pTTS12 were previously  
132 reported to be upregulated in the presence of toluene (11). We propose to name RPPX\_26255-26260  
133 gene pair as 'slv' due to its elevated expression in the presence of solvent. In a first attempt to identify

134 additional potential solvent tolerance regions of pTTS12, we deleted the *srpABC* genes ( $\Delta srp$ ),  
135 RPPX\_26255-26260 genes ( $\Delta s/v$ ), and the combination of both gene clusters ( $\Delta srp \Delta s/v$ ) from pTTS12  
136 in wild-type *P. putida* S12.

137 All strains were compared for growth under increasing toluene concentrations in liquid LB  
138 medium (Figure 2). In the presence of low concentrations of toluene (0.1% v/v), all strains showed  
139 similar growth. With the addition of 0.15% v/v toluene, S12  $\Delta s/v$ , S12  $\Delta srp$  and S12  $\Delta srp \Delta s/v$  exhibit  
140 slower growth and reached a lower OD<sub>600nm</sub> compared to the wildtype S12 strain. S12  $\Delta s/v$  and S12  
141  $\Delta srp$  achieved a higher OD<sub>600nm</sub> in batch growth compared to S12  $\Delta pTTS12$  and S12  $\Delta srp \Delta s/v$  due to  
142 the presence of SrpABC efflux pump or RPPX\_26255-26260 gene pair. Interestingly, S12  $\Delta srp \Delta s/v$  (still  
143 containing pTSS12) exhibit diminished growth compared to S12  $\Delta pTTS12$ . This may be an indication of  
144 megaplasmid burden in the absence of essential genes for solvent tolerance. With 0.2% and 0.3% v/v  
145 toluene added to the medium, S12  $\Delta srp$ , S12  $\Delta srp \Delta s/v$ , and S12  $\Delta pTTS12$  were unable to grow while  
146 the wildtype S12 and S12  $\Delta s/v$  were able to grow although S12  $\Delta s/v$  reached a clearly lower OD<sub>600nm</sub>  
147 compared to wildtype S12. Taken together, these results demonstrate an important role for both the  
148 SrpABC efflux pump and the *s/v* gene pair in conferring solvent tolerance.

149

## 150 **Transferability of solvent tolerance exerted by SrpABC efflux pump and *s/v* gene pair in Gram-** 151 **negative bacteria**

152 Functionality of the *srp* operon and *s/v* gene pair was explored in the model Gram-negative non-  
153 solvent tolerant strains, *P. putida* KT2440, *E. coli* TG1 and *E. coli* BL21 (DE3). We complemented  
154 *srpRSABC* (*srp* operon), *s/v* gene pair, and a combination of both gene clusters into *P. putida* S12-6, *P.*  
155 *putida* KT2440, *E. coli* TG1, and *E. coli* BL21 (DE3) using mini-Tn7 transposition.

156 Chromosomal introduction of *s/v* into S12-6 and KT2440, improved growth of the resulting  
157 strains at 0.15% v/v toluene compared to S12-6 and KT2440 (Figure 3). The introduction of *srp* or a  
158 combination of *s/v* and *srp* enables S12-6 and KT2440 to grow in the presence of 0.3% v/v toluene. In  
159 KT2440, the introduction of both *s/v* and *srp* resulted in a faster growth in the presence of 0.3% v/v

160 toluene compared to the addition of only *srp* (Figure 3B). Interestingly, the growth of S12-6 *srp,slv* and  
161 S12.6 *srp* are better in comparison with S12 wildtype (Figure 3A). The observed faster growth of S12-  
162 6 *srp,slv* and S12.6 *srp* may be due to more efficient growth in the presence of toluene supported by  
163 a chromosomally introduced *srp* operon, compared to its original megaplasmid localization. Indeed,  
164 replication of this large megaplasmid is likely to require additional maintenance energy. To  
165 corroborate this, we complemented the megaplasmid lacking the solvent pump, pTTS12 (Tc<sup>R</sup>::*srpABC*)  
166 into *P. putida* S12-6 *srp* resulting in the strain *P. putida* S12-9. Indeed, *P. putida* S12-9 showed further  
167 reduced growth in the presence of 0.20 and 0.30 % toluene (Figure S2), indicating the metabolic  
168 burden of carrying the megaplasmid. We conclude that the SrpABC efflux pump can be regarded as  
169 the major contributor to solvent tolerance from pTTS12. The *slv* gene pair appears to promote  
170 tolerance of *P. putida* S12 at least under moderate solvent concentrations.

171 The intrinsic solvent tolerance of *E. coli* strains was observed to be clearly lower than that of *P.*  
172 *putida* (Figure 4). The wild type *E. coli* strains were able to withstand a maximum 0.10% v/v toluene,  
173 whereas plasmid-cured *P. putida* S12-6 and *P. putida* KT2440 were able to grow in the presence of  
174 0.15% v/v toluene. With the introduction of *slv* and *srp* in both *E. coli* strains, solvent tolerance was  
175 increased up to 0.15% and 0.2% v/v toluene respectively (Figure 4). A combination of *slv* and *srp* also  
176 increased tolerance to 0.20% v/v toluene while showing a better growth than chromosomal  
177 introduction of just *srp*. However, none of these strains were able to grow in the presence of 0.30%  
178 v/v toluene.

179 qPCR analysis of SrpABC expression (Table S1) in *P. putida* S12, *P. putida* KT2440, *E. coli* TG1,  
180 and *E. coli* BL21(DE3) confirmed that *srpA*, *srpB*, and *srpC* were expressed in basal levels in all strains.  
181 In the presence of 0.10 % toluene, the expression of *srpA*, *srpB*, and *srpC* was clearly upregulated in  
182 all strains. Thus, the lower solvent tolerance conferred by introducing SrpABC efflux pump in *E. coli*  
183 strains was not due to lower expression of the *srp* genes. Analysis of the codon adaptation index (CAI)  
184 (<http://genomes.urv.es/CAIcal/>) (31) showed that for both the *P. putida* and *E. coli* strains the CAI  
185 values of the *srp* operon are suboptimal, clearly below 0.8 to 1.0 (Table S2). Interestingly, the CAI



186 values were higher for *E. coli* (0.664) than for *P. putida* (0.465) predicting a better protein translation  
187 efficiency of the *srp* operon in *E. coli*. Hence, reduced translation efficiency is not likely to be the cause  
188 of lower performance of *srp* operon in *E. coli* strains for generating solvent tolerance. Overall, our  
189 results indicate that in addition to the solvent efflux pump, *P. putida* S12 and *P. putida* KT2440 are  
190 intrinsically more robust compared to *E. coli* TG1 and *E. coli* BL21 DE3 in the presence of toluene.

191

### 192 ***slv* gene pair constitutes a novel toxin-antitoxin system**

193 BLASTp analysis was initiated to further characterize RPPX\_26255 and RPPX\_26260. This indicated  
194 that RPPX\_26260 and RPPX\_26255 likely represents a novel toxin-antitoxin (TA) system. Through a  
195 database search on TADB2.0 (19, 20), we found that RPPX\_26260 is a toxin of COG5654 family typically  
196 encodes a RES domain-containing protein, having a conserved Arginine (R) – Glutamine (E) – Serine  
197 (S) motive providing a putative active site and RPPX\_26255 is an antitoxin of COG5642 family. Based  
198 on its involvement in solvent tolerance, we propose naming the toxin-encoding RPPX\_26260 as *slvT*  
199 and the antitoxin-encoding RPPX\_26255 as *slvA*.

200 Makarova and colleague identified putative toxin-antitoxin pairs through genome mining of  
201 reference sequences in NCBI database (32). They identified 169 pairs of the COG5654-COG5642 TA  
202 system from the reference sequences. Here, we constructed a phylogenetic tree of the COG5654-  
203 COG5642 TA system including *SlvA* (AJA16859.1) and *SlvT* (AJA16860.1) as shown in figures 5A and 6A.  
204 *SlvA* and *SlvT* cluster together with other plasmid-borne toxin-antitoxin from *Burkholderia*  
205 *vietnamensis* G4, *Methylibium petroleiphilum* PM1, *Rhodospirillum rubrum* ATCC 11170, *Xanthobacter*  
206 *autotrophicus* Py2, *Sinorhizobium meliloti* 1021, *Sinorhizobium medicae* WSM419, and *Gloeobacter*  
207 *violaceus* PCC7421. Multiple alignments of *SlvAT* against these toxin-antitoxin of COG5654-COG5642  
208 TA system are shown in figures 5B and 6B.

209 Of the 169 TA pairs of the COG5654-COG5642 TA system, three TA pairs have recently been  
210 characterized: *ParST* from *Sphingobium sp.* YBL2 (AJR25281.1, AJR25280.1), *PP\_2433-2434* from *P.*  
211 *putida* KT2440 (NP\_744581.1, NP\_744582.1), and *MbcAT* from *Mycobacterium tuberculosis* H37Rv

212 (NP\_216506.1, NP216505.1) (Figure 5A and 6A, indicated by bold text and asterisks). 3D-model  
213 prediction of SlvT and SlvA protein using the I-TASSER protein prediction suite (33), indicated that SlvT  
214 and SlvA showed highest structural similarity to the MbcAT system from *Mycobacterium tuberculosis*  
215 (Figure 5C and 6C) which is reported to be expressed during stress condition (25). Amino acid  
216 conservation between SlvAT and these few characterized toxin-antitoxin pairs is relatively low, as they  
217 do not belong to the same clade (Figure 5A and 6A). However, 100% conservation is clearly observed  
218 on the putative active side residues: arginine (R) 35, tyrosine (Y) 45, and glutamine (E) 56 and only  
219 75% consensus is shown on serine (S) 133 residue (Figure S3).

220 According to the model with highest TM score, SlvT is predicted to consist of four beta sheets  
221 and four alpha-helices. As such, SlvT exhibits large structural similarity with diphtheria toxin which  
222 functions as ADP-ribosyl transferase enzyme. Diphtheria toxin can degrade NAD<sup>+</sup> into nicotinamide  
223 and ADP ribose (34). A similar function was recently identified for COG5654-family toxins from *P.*  
224 *putida* KT2440, *M. tuberculosis*, and *Sphingobium* sp (25, 26, 35).

225

#### 226 ***slvT* toxin causes cell growth arrest by depleting cellular NAD<sup>+</sup>**

227 To prove that *slvAT* presents a pair of toxin and antitoxin, *slvA* and *slvT* were cloned separately  
228 in pUK21 (lac-inducible promoter) and pBAD18 (ara-inducible promoter), respectively. The two  
229 constructs were cloned into *E. coli* BL21 (DE3). Growth of the resulting strains was monitored during  
230 conditional expression of the *slvA* and *slvT* genes (figure 6A). At the mid-log growth phase, a final  
231 concentration of 0.8% arabinose was added to the culture (\*), inducing expression of *slvT*. After 2  
232 hours of induction, growth of this strain ceased while the uninduced control culture continued to  
233 grow. Upon addition of 2 mM IPTG (\*\*), growth of the *slvT*-induced culture was immediately restored,  
234 reaching a similar OD<sub>600nm</sub> as the uninduced culture.

235 Bacterial cell division was further studied by flow cytometer-analyses during the expression  
236 of *slvT* and *slvA*. After approximately 6 hours of growth (indicated by grey arrow on figure 7A), samples  
237 were taken from control, arabinose, and arabinose + IPTG induced liquid culture. Cell morphology was

238 analyzed by light microscopy and DNA content of the individual cells in the culture were measured  
239 using flow cytometer with SYBR green II staining (figure 7B). Indeed, absence of dividing cells and  
240 lower DNA content were observed during the induction of only *slvT* toxin with arabinose (figure 7B).  
241 Subsequent addition of IPTG to induce *slvA* expression was shown to restore cell division and an  
242 upshift of DNA content similar to that of control strain (figure 7B). While the expression of *slvT* was  
243 not observed to be lethal to bacterial strain, this experiment showed that the expression of *slvT* toxin  
244 stalled DNA replication and subsequently cell division. The induction of *slvA* subsequently restored  
245 bacterial DNA replication and cell division.

246 To corroborate a putative target of *slvT*, concentrations of NAD<sup>+</sup> were measured during the  
247 induction experiment (figure 7C). Before the addition of arabinose to induce *slvT* (orange arrow on  
248 figure 7A), NAD<sup>+</sup> was measured and compared to the strain harboring empty pUK21 and pBAD18  
249 (figure 7B). On average, at this time point NAD<sup>+</sup> level is similar between the *slvAT* bearing strain and  
250 the control strain. NAD<sup>+</sup> was measured again after arabinose induction when growth of the induced  
251 strain has diminished (blue arrow on figure 7A). At this time point, the measured NAD<sup>+</sup> was 32%  
252 ( $\pm 14.47$ ) of control strain. After the induction of *slvA*, NAD<sup>+</sup> was immediately restored to a level of  
253 77% ( $\pm 9.97$ ) compared to the control strain. Thus, induction of *slvT* caused depletion of NAD<sup>+</sup>, while  
254 induction of *slvA* immediately increased NAD<sup>+</sup> level, indicating that *slvAT* is a pair of toxin-antitoxin  
255 which controls its toxicity through NAD<sup>+</sup> depletion.

256

### 257 ***slvAT* governs megaplasmid pTTS12 stability**

258 In addition to its role in solvent tolerance, localization of the *slvAT* pair on megaplasmid pTTS12 may  
259 have an implications for plasmid stability. pTTS12 is a very stable megaplasmid that cannot be  
260 spontaneously cured from *P. putida* S12 and cannot be removed by introducing double strand breaks  
261 (see above). We deleted *slvT* and *slvAT* from the megaplasmid to study their impact in pTTS12 stability.  
262 With the deletion of *slvT* and *slvAT*, the survival rate during treatment with mitomycin C improved

263 significantly reaching  $1.01 (\pm 0.17) \times 10^{-4}$  and  $1.25 (\pm 0.81) \times 10^{-4}$  respectively while the wildtype S12  
264 had a survival rate of  $2.48 (\pm 0.58) \times 10^{-8}$ .

265 We determined the curing rate of pTTS12 from the surviving colonies. In wildtype S12, the  
266 curing rate was 2% (see also above) while in  $\Delta s/vT$  and  $\Delta s/vAT$  curing rate increased to 41.3% ( $\pm 4.1\%$ )  
267 and 79.3% ( $\pm 10\%$ ) respectively, underscoring an important role for *s/vAT* in megaplasmid stability.  
268 We attempted to cure megaplasmid by introducing double strand break (DSB) as previously described  
269 on *Pseudomonas taiwanensis* VLB120 (30, 36). This indeed was not possible in wildtype S12 and  $\Delta s/vT$ ,  
270 however  $\Delta s/vAT$  now showed plasmid curing by DSB resulting in a curing rate of 34.3% ( $\pm 16.4\%$ ).

271 Since  $\Delta s/vT$  and  $\Delta s/vAT$  may compromise megaplasmid stability, we now performed  
272 megaplasmid stability tests by growing S12 and KT2440 harboring pSW-2 (negative control), pTTS12  
273 (positive control), pTTS12  $\Delta s/vT$ , and pTTS12  $\Delta s/vAT$  on LB media with 10 passages ( $\pm 10$   
274 generations/passage step) as shown on figure 8. Both KT2440 and S12 easily lost the negative control  
275 plasmid pSW-2 (figure 8). Wildtype pTTS12 was not lost during this test confirming that pTTS12 is  
276 indeed a stable plasmid. Furthermore, the  $\Delta s/vT$  strains also did not show loss of megaplasmid.  
277 Interestingly, the  $\Delta s/vAT$  strains spontaneously lost the megaplasmid, confirming that the *s/vAT*  
278 module is not only important to promote solvent tolerance but also determines megaplasmid stability  
279 in *P. putida* S12 and KT2440.

280

## 281 Discussion

282 Gram-negative bacteria are regarded as preferred microbial hosts for the production of  
283 various important industrial chemicals, including biofuels and aromatic compounds. However,  
284 production of such high-value chemicals often creates an adverse effect on the cell growth due to  
285 toxicity of the produced compounds (37). Thus, in the biobased production of aromatic chemicals and  
286 biopolymers, solvent-tolerance is an essential trait for microbial hosts. In this study, removal of the  
287 megaplasmid pTTS12 from *P. putida* S12 led to the loss of the solvent-tolerant phenotype and  
288 subsequent complementation of megaplasmid pTTS12 into the plasmid-cured *P. putida* S12 restored  
289 solvent tolerance. The SrpABC efflux pump and SlvAT toxin-antitoxin module are encoded on pTTS12  
290 and improved tolerance and survival of *P. putida* S12 to toluene exposure, making these gene clusters  
291 suitable candidates for exchange with various microbial hosts to increase tolerance towards toxic  
292 products (38).

293 Among all the genes encoded on the megaplasmid pTTS12, the SrpABC efflux pump appears  
294 as the major effector of solvent tolerance in *P. putida* S12 (Figure 9). A previous report applied SrpABC  
295 in whole-cell biocatalysis while optimizing the production of 1-naphtol in *E. coli* TG1 (15, 16).  
296 Implementation of the SrpABC efflux pump increased the production of 1-naphtol from *E. coli*,  
297 however, production was still higher using *P. putida* S12 as the production host. Here, we compared  
298 the performance of SrpABC efflux pump in several established industrial strains. SrpABC was  
299 expressed at a basal level and upregulated in the presence of 0.10 % v/v toluene in *P. putida* S12, *P.*  
300 *putida* KT2440, *E. coli* TG1, and *E. coli* BL21(DE3) strains. However, the *E. coli* strains clearly showed a  
301 smaller increase in toluene tolerance than the *P. putida* strains. This indicates that besides having an  
302 efficient solvent efflux pump, *P. putida* S12 and *P. putida* KT2440 are inherently more robust in the  
303 presence of toluene and, presumably, other organic solvents compared to *E. coli* TG1 and *E. coli*  
304 BL21(DE3). Detailed investigation of this intrinsic solvent tolerance of *P. putida* may further reveal the  
305 basis for this intrinsic robustness.

306 We recently identified two genes upregulated in transcriptome analysis of toluene-shocked  
307 *P. putida*, RPPX\_26255 and RPPX\_26260, putatively playing a role in solvent tolerance (11). Here, we  
308 confirmed this finding and demonstrated that these genes together form a novel toxin-antitoxin  
309 module (Figure 7). Sequence comparison with other known toxin-antitoxin gene pairs in the toxin-  
310 antitoxin database TADB2.0, revealed that RPPX\_26255 (*slvA*) contains a DUF2834 domain  
311 characteristic for COG5642-family antitoxin, while RPPX\_26260 (*slvT*) carries a conserved RES domain  
312 like other COG5654-family toxins (19, 20). In accordance to this result, structural similarity of SlvT and  
313 SlvA with other toxin-antitoxin pairs of the COG5654-COG5642 family was confirmed through 3D-  
314 structure prediction with the protein structure and function prediction tool I-TASSER (33).

315 Toxin-antitoxin systems are known to be important in antibiotic persistent strains as a trigger  
316 to enter and exit the dormant state, causing the cell to become unaffected by the antibiotic (39).  
317 Among *Pseudomonas* species, several toxin-antitoxin systems are reported to be involved in survival  
318 strategies, such as stress response, biofilm formation, and antimicrobial persistence (27, 40–42). In  
319 this paper, we show that the novel toxin-antitoxin system represented by SlvAT improves solvent  
320 tolerance and is important for megaplasmid pTTS12 stability. SlvT exerts toxicity by degradation of  
321 NAD<sup>+</sup>, like other toxins of the COG5654-family, and expression of antitoxin SlvA immediately restored  
322 NAD<sup>+</sup> levels. Depletion of NAD<sup>+</sup> interfered with DNA replication and caused arrest of cell division  
323 similar to another recently described COG5654-COG5642 family toxin-antitoxin pair (27).

324 Megaplasms, such as pTTS12, may cause a metabolic burden for the strains that harbor  
325 them, and such plasmid can be a source of genetic instability (43). We show that pTTS12 indeed  
326 imposed a metabolic burden in the presence of organic solvent. In addition, we demonstrated the  
327 importance of the SlvAT toxin-antitoxin module for the stabilization and maintenance of the  
328 megaplasmid which contains several gene clusters responsible for efficient stress tolerance  
329 phenotypes. Future research is required to reveal details of the control mechanisms operating in  
330 balanced *in vivo*.

331 In summary, our experiments confirmed that the SrpABC efflux pump is the major contributor

332 of solvent tolerance on the megaplasmid pTTS12. In addition, the megaplasmid carries a novel toxin-  
333 antitoxin system SlvAT (RPPX\_26255 and RPPX\_26260) which promotes solvent tolerance in *P. putida*  
334 S12 and is important to maintain genetic stability of pTTS12. Chromosomal introduction of the *srpABC*  
335 operon genes in combination with *slvAT* confers a clear solvent tolerance phenotype in other  
336 industrial strains previously lacking this phenotype such as *P. putida* KT2440, *E. coli* TG1, and *E. coli*  
337 BL21(DE3).

## 338 **Materials and Methods**

### 339 **Strains and culture conditions**

340 Strains and plasmids used in this paper are listed in Table S1. All *P. putida* strains were grown in  
341 Lysogeny Broth (LB) on 30 °C with 200 rpm shaking. *E. coli* strains were cultivated in LB on 37 °C with  
342 250 rpm. For solid cultivation, 1.5 % (w/v) agar was added to LB. M9 minimal medium was  
343 supplemented with 2 mg MgSO<sub>4</sub> and 0.2 % of citrate as sole carbon source (44). Toluene atmosphere  
344 growth was evaluated on solid LB media in a glass plate incubated in an exicator with toluene supplied  
345 through the gas phase at 30 °C. Solvent tolerance analysis was performed by growing *P. putida* S12  
346 strains in LB starting from OD<sub>600</sub> 0.1 in Boston bottles with Mininert bottle caps. When required,  
347 gentamycin (25 mg L<sup>-1</sup>), ampicillin (100 mg L<sup>-1</sup>), kanamycin (50 mg L<sup>-1</sup>), indole (100 g L<sup>-1</sup>), potassium  
348 tellurite (6.75-200 mg L<sup>-1</sup>), arabinose (0.8% m/v), and IPTG (2 mM) were added to the media.

### 349 **DNA and RNA methods**

350 All PCRs were performed using Phusion polymerase (Thermo Fisher) according to the manufacturer's  
351 manual. Primers used in this paper (Table S3) were procured from Sigma-Aldrich. PCR products were  
352 checked by gel electrophoresis on 1 % (w/v) TBE agarose containing 5 µg mL<sup>-1</sup> ethidium bromide (110V,  
353 0.5x TBE running buffer). For RT-qPCR analysis, RNA was extracted using TRIzol reagent (Invitrogen)  
354 according to the manufacturer's manual. The obtained RNA samples were immediately reverse  
355 transcribed using iScript™ cDNA synthesis kit (BioRad) and cDNA may be stored at -20 °C prior to qPCR  
356 analysis. qPCR was performed using iTaq™ Universal SYBR Green Supermix (BioRad) on CFX96 Touch™  
357 Real-Time PCR Detection System (BioRad). The genome sequence of *P. putida* S12 ΔpTTS12 was  
358 analysed using Illumina HiSeq (GenomeScan BV, The Netherlands) and assembled according to the  
359 existing complete genome sequence (Accession no. CP009974 and CP009975) (12). These sequence  
360 data have been submitted to the DDBJ/EMBL/GenBank databases under accession number ....

361



## 362 **Curing and complementation of megaplasmid pTTS12 from *P. putida* S12**

363 *P. putida* S12 was grown in LB to reach early exponential phase ( $\pm$  3 hours or OD<sub>600nm</sub> 0.4-0.6).  
364 Subsequently, mitomycin C was added to the liquid LB culture to a final concentration range of 10, 20,  
365 30, 40, or 50  $\mu$ g/ml. These cultures were grown for 24 hours and plated on M9 minimal media  
366 supplemented with indole to select for the absence of megaplasmid. Loss of megaplasmid was  
367 confirmed by loss of other phenotypes connected with the megaplasmid such as MIC reduction of  
368 potassium tellurite and solvent sensitivity under toluene atmosphere, as well as through genomic DNA  
369 sequencing. Complementation of megaplasmid pTTS12 was performed using bi-parental mating  
370 between *P. putida* S12-1 (pTTS12 Km<sup>R</sup>) and plasmid-cured strains *P. putida* S12  $\Delta$ pTTS12 (Gm<sup>R</sup> :: Tn7)  
371 and followed by selection on LB agar supplemented with Kanamycin and Gentamicin.

## 372 **Plasmid cloning**

373 Deletion of *srpABC*, *slvT*, and *slvAT* genes was performed using homologous recombination between  
374 free-ended DNA sequences that are generated by cleavage on unique I-SceI sites (36). Two  
375 homologous recombination sites were chosen downstream (TS-1) and upstream (TS-2) of the target  
376 genes. TS-1 and TS-2 fragments were obtained by performing PCR using primers listed in Table S1.  
377 Constructs were verified by DNA sequencing. Mating was performed as described by Wynands and  
378 colleagues (30). Deletion of *srpABC*, *slvT*, and *slvAT* was verified by PCR and Sanger sequencing  
379 (Macrogen B.V., Amsterdam).

380 Introduction of the complete *srp* operon (*srpRSABC*) and *slvAT* was accomplished using the  
381 mini-Tn7 delivery vector backbone of pBG35 developed by Zobel and colleagues (45). The DNA  
382 fragments were obtained by PCR using primer pairs listed on Table S3 and ligated into pBG35 plasmid  
383 at PacI and XbaI restriction site. This construct generated a Tn7 transposon segment in pBG35  
384 containing gentamycin resistance marker and *srp* operon with Tn7 recognition sites flanking on 5' and  
385 3' sides of the segment. Restriction analysis followed by DNA sequencing (Macrogen, The Netherlands)  
386 were performed to confirm the correct pBG-srp, pBG-slv, and pBG-srp-slv construct. The resulting  
387 construct was cloned in *E. coli* WM3064 and introduced into *P. putida* or *E. coli* strains with the help

388 of *E. coli* WM3064 pTnS-1. Integration of construct into Tn7 transposon segment was confirmed by  
389 gentamicin resistance, PCR, and the ability of the resulting transformants to withstand and grow under  
390 toluene atmosphere.

### 391 **Toxin-antitoxin assay**

392 Bacterial growth during toxin-antitoxin assay was observed in LB media supplemented with 100 mg  
393 L<sup>-1</sup> ampicillin and 50 mg L<sup>-1</sup> kanamycin. Starting cultures were inoculated from 1:100 dilution of  
394 overnight culture (OD<sub>600</sub> ± 0.1) into a microtiter plate (96 well) and bacterial growth was measured  
395 using Tecan Spark™ 10M. To induce toxin and antitoxin, a total concentration of 0.8% m/v arabinose  
396 and 2 mM IPTG were added to the culture respectively. Cell morphology was observed using light  
397 microscope (Zeiss Axiolab 5) at 100x magnification. A final concentration of 2.5x SYBR Green I (10000x  
398 stock, New England Biolabs) was applied to visualize DNA, followed by two times washing with 1x  
399 phosphate buffer saline (PBS), and analyzed using a Guava® easyCyte Single Sample Flow Cytometer  
400 (Millipore). At indicated time points, NAD<sup>+</sup> levels were measured using NAD/NADH-Glo™ assay kit  
401 (Promega) according to the manufacturer's manual. RPPX\_26255 and RPPX\_26260 was modelled  
402 using I-TASSER server (33) and visualized using PyMol (version 2.3.1). Phylogenetic trees of toxin-  
403 antitoxin module derived from COG5654-COG5642 family were constructed using MEGA (version  
404 10.0.5) as a maximum likelihood tree with 100 bootstrap and visualized using iTOL webserver  
405 (<https://itol.embl.de>) (46).

406

## 407 **Acknowledgement**

408 H. Kusumawardhani was supported by the Indonesia Endowment Fund for Education (LPDP) as  
409 scholarship provider from the Ministry of Finance, Indonesia. R. Hosseini was funded by the Dutch  
410 National Organization for Scientific Research NWO, through the ERAnet-Industrial Biotechnology  
411 program, project 'Pseudomonas 2.0'.

412

## 413 References

- 414 1. Aono R, Kobayashi H. 1997. Cell surface properties of organic solvent-tolerant mutants of  
415 *Escherichia coli* K-12. *Appl Environ Microbiol* 63:3637–3642.
- 416 2. Kabelitz N, Santos PM, Heipieper HJ. 2003. Effect of aliphatic alcohols on growth and degree  
417 of saturation of membrane lipids in *Acinetobacter calcoaceticus*. *FEMS Microbiol Lett*  
418 220:223–227.
- 419 3. Hartmans S, van der Werf MJ, de Bont JA. 1990. Bacterial degradation of styrene involving a  
420 novel flavin adenine dinucleotide-dependent styrene monooxygenase. *Appl Environ*  
421 *Microbiol* 56:1347–1351.
- 422 4. Heipieper HJ, Weber FJ, Sikkema J, Keweloh H, de Bont JAM. 1994. Mechanisms of resistance  
423 of whole cells to toxic organic solvents. *Trends ...* 12:409–415.
- 424 5. Wierckx NJP, Ballerstedt H, de Bont JAM, Wery J. 2005. Engineering of solvent-tolerant  
425 *Pseudomonas putida* S12 for bioproduction of phenol from glucose. *Appl Environ Microbiol*  
426 71:8221–8227.
- 427 6. Verhoef S, Wierckx N, Westerhof RGM, de Winde JH, Ruijsenaars HJ. 2009. Bioproduction of  
428 p-hydroxystyrene from glucose by the solvent-tolerant bacterium *Pseudomonas putida* S12 in  
429 a two-phase water-decanol fermentation. *Appl Environ Microbiol* 75:931–936.
- 430 7. Verhoef S, Ruijsenaars HJ, de Bont JAM, Wery J. 2007. Bioproduction of p-hydroxybenzoate  
431 from renewable feedstock by solvent-tolerant *Pseudomonas putida* S12. *J Biotechnol* 132:49–  
432 56.
- 433 8. Ruijsenaars HJ, Sperling EMGM, Wiegerinck PHG, Brands FTL, Wery J, de Bont JAM. 2007.  
434 Testosterone 15beta-hydroxylation by solvent tolerant *Pseudomonas putida* S12. *J Biotechnol*  
435 131:205–208.
- 436 9. Koopman F, Wierckx N, de Winde JH, Ruijsenaars HJ. 2010. Efficient whole-cell  
437 biotransformation of 5-(hydroxymethyl)furfural into FDCA, 2,5-furandicarboxylic acid.  
438 *Bioresour Technol* 101:6291–6296.

- 439 10. Volkers RJM, de Jong AL, Hulst AG, van Baar BLM, de Bont JAM, Wery J. 2006. Chemostat-  
440 based proteomic analysis of toluene-affected *Pseudomonas putida* S12. *Environ Microbiol*  
441 8:1674–1679.
- 442 11. Volkers RJM, Snoek LB, Ruijsenaars HJ, de Winde JH. 2015. Dynamic Response of  
443 *Pseudomonas putida* S12 to Sudden Addition of Toluene and the Potential Role of the Solvent  
444 Tolerance Gene *trgl*. *PLoS One* 10:e0132416.
- 445 12. Kuepper J, Ruijsenaars HJ, Blank LM, de Winde JH, Wierckx N. 2015. Complete genome  
446 sequence of solvent-tolerant *Pseudomonas putida* S12 including megaplasmid pTTS12. *J*  
447 *Biotechnol* 200:17–18.
- 448 13. Kieboom J, Dennis JJ, de Bont JAM, Zylstra GJ. 1998. Identification and Molecular  
449 Characterization of an Efflux Pump Involved in *Pseudomonas putida* S12 Solvent Tolerance. *J*  
450 *Biol Chem* 273:85–91.
- 451 14. Kieboom J, Dennis JJ, Zylstra GJ, de Bont JA. 1998. Active efflux of organic solvents by  
452 *Pseudomonas putida* S12 is induced by solvents. *J Bacteriol* 180:6769–6772.
- 453 15. Garikipati SVBJ, Mclver AM, Peeples TL. 2009. Whole-Cell Biocatalysis for 1-Naphthol  
454 Production in Liquid-Liquid Biphasic Systems. *Appl Environ Microbiol* 75:6545–6552.
- 455 16. Janardhan Garikipati SVB, Peeples TL. 2015. Solvent resistance pumps of *Pseudomonas*  
456 *putida* S12: Applications in 1-naphthol production and biocatalyst engineering. *J Biotechnol*  
457 210:91–99.
- 458 17. O'Connor KE, Dobson AD, Hartmans S. 1997. Indigo formation by microorganisms expressing  
459 styrene monooxygenase activity. *Appl Environ Microbiol* 63:4287–4291.
- 460 18. Isken S, de Bont JAM. 2000. The solvent efflux system of *Pseudomonas putida*. *Appl Microbiol*  
461 *Biotechnol* 54:711–714.
- 462 19. Shao Y, Harrison EM, Bi D, Tai C, He X, Ou HY, Rajakumar K, Deng Z. 2011. TADB: A web-based  
463 resource for Type 2 toxin-antitoxin loci in bacteria and archaea. *Nucleic Acids Res.*
- 464 20. Xie Y, Wei Y, Shen Y, Li X, Zhou H, Tai C, Deng Z, Ou HY. 2018. TADB 2.0: An updated database

- 465 of bacterial type II toxin-antitoxin loci. *Nucleic Acids Res* 46:D749–D753.
- 466 21. Harms A, Brodersen DE, Mitarai N, Gerdes K. 2018. Toxins, Targets, and Triggers: An Overview  
467 of Toxin-Antitoxin Biology. *Mol Cell* 70:768–784.
- 468 22. Maisonneuve E, Gerdes K. 2014. Molecular mechanisms underlying bacterial persisters. *Cell*  
469 157:539–548.
- 470 23. McKenzie JL, Robson J, Berney M, Smith TC, Ruthe A, Gardner PP, Arcus VL, Cook GM. 2012. A  
471 vapbc toxin-antitoxin module is a posttranscriptional regulator of metabolic flux in  
472 mycobacteria. *J Bacteriol*.
- 473 24. Pinto UM, Pappas KM, Winans SC. 2012. The ABCs of plasmid replication and segregation. *Nat*  
474 *Rev Microbiol* 10:755–765.
- 475 25. Freire DM, Gutierrez C, Garza-Garcia A, Grabowska AD, Sala AJ, Ariyachaokun K, Panikova T,  
476 Beckham KSH, Colom A, Pogenberg V, Cianci M, Tuukkanen A, Boudehen YM, Peixoto A,  
477 Botella L, Svergun DI, Schnappinger D, Schneider TR, Genevaux P, de Carvalho LPS, Wilmanns  
478 M, Parret AHA, Neyrolles O. 2019. An NAD + Phosphorylase Toxin Triggers Mycobacterium  
479 tuberculosis Cell Death. *Mol Cell* 73:1–10.
- 480 26. Piscotta FJ, Jeffrey PD, Link AJ. 2019. ParST is a widespread toxin–antitoxin module that  
481 targets nucleotide metabolism. *Proc Natl Acad Sci* 116:826–834.
- 482 27. Skjerning RB, Senissar M, Winther KS, Gerdes K, Brodersen DE. 2018. The RES domain toxins  
483 of RES-Xre toxin-antitoxin modules induce cell stasis by degrading NAD. *Mol Microbiol*  
484 66:213.
- 485 28. Trevors JT. 1986. Plasmid curing in bacteria. *FEMS Microbiol Lett* 32:149–157.
- 486 29. Chakrabarty AM. 1972. Genetic basis of the biodegradation of salicylate in *Pseudomonas*. *J*  
487 *Bacteriol* 112:815–823.
- 488 30. Wynands B, Lenzen C, Otto M, Koch F, Blank LM, Wierckx N. 2018. Metabolic engineering of  
489 *Pseudomonas taiwanensis* VLB120 with minimal genomic modifications for high-yield phenol  
490 production. *Metab Eng* 47:121–133.

- 491 31. Puigbò P, Bravo IG, Garcia-Vallve S. 2008. CAIcal: A combined set of tools to assess codon  
492 usage adaptation. *Biol Direct* 3:38.
- 493 32. Makarova KS, Wolf YI, Koonin E V. 2009. Comprehensive comparative-genomic analysis of  
494 Type 2 toxin-antitoxin systems and related mobile stress response systems in prokaryotes.  
495 *Biol Direct* 4:19.
- 496 33. Yang J, Yan R, Roy A, Xu D, Poisson J, Zhang Y. 2015. The I-TASSER suite: Protein structure and  
497 function prediction. *Nat Methods* 12:7–8.
- 498 34. Murphy JR. 2011. Mechanism of diphtheria toxin catalytic domain delivery to the eukaryotic  
499 cell cytosol and the cellular factors that directly participate in the process. *Toxins (Basel)*  
500 3:294–308.
- 501 35. Skjerning RB, Senissar M, Winther KS, Gerdes K, Brodersen DE. 2019. The RES domain toxins  
502 of RES-Xre toxin-antitoxin modules induce cell stasis by degrading NAD<sup>+</sup>. *Mol Microbiol*  
503 111:221–236.
- 504 36. Martínez-García E, de Lorenzo V. 2011. Engineering multiple genomic deletions in Gram-  
505 negative bacteria: analysis of the multi-resistant antibiotic profile of *Pseudomonas putida*  
506 KT2440. *Environ Microbiol* 13:2702–2716.
- 507 37. Kusumawardhani H, Hosseini R, de Winde JH. 2018. Solvent Tolerance in Bacteria: Fulfilling  
508 the Promise of the Biotech Era? *Trends Biotechnol* 36:1025–1039.
- 509 38. Lee SY, Kim HU. 2015. Systems strategies for developing industrial microbial strains. *Nat*  
510 *Biotechnol* 33:1061–1072.
- 511 39. Page R, Peti W. 2016. Toxin-antitoxin systems in bacterial growth arrest and persistence. *Nat*  
512 *Chem Biol* 12:208–214.
- 513 40. Sun C, Guo Y, Tang K, Wen Z, Li B, Zeng Z, Wang X. 2017. MqsR/MqsA toxin/antitoxin system  
514 regulates persistence and biofilm formation in *pseudomonas putida* KT2440. *Front Microbiol*  
515 8:840.
- 516 41. Molina L, Udaondo Z, Duque E, Fernández M, Bernal P, Roca A, De La Torre J, Ramos JL. 2016.

- 517 Specific gene loci of clinical *Pseudomonas putida* isolates. *PLoS One* 11:e0147478.
- 518 42. Tamman H, Ainelo A, Ainsaar K, Hõrak R. 2014. A moderate toxin, GraT, modulates growth  
519 rate and stress tolerance of *Pseudomonas putida*. *J Bacteriol* 196:157–169.
- 520 43. Sengupta M, Austin S. 2011. Prevalence and Significance of Plasmid Maintenance Functions in  
521 the Virulence Plasmids of Pathogenic Bacteria. *Infect Immun* 79:2502–2509.
- 522 44. Abril MA, Michan C, Timmis KN, Ramos JL. 1989. Regulator and enzyme specificities of the  
523 TOL plasmid-encoded upper pathway for degradation of aromatic hydrocarbons and  
524 expansion of the substrate range of the pathway. *J Bacteriol* 171:6782–6790.
- 525 45. Zobel S, Benedetti I, Eisenbach L, de Lorenzo V, Wierckx N, Blank LM. 2015. Tn7-Based Device  
526 for Calibrated Heterologous Gene Expression in *Pseudomonas putida*. *ACS Synth Biol* 4:1341–  
527 1351.
- 528 46. Letunic I, Bork P. 2019. Interactive Tree Of Life (iTOL) v4: recent updates and new  
529 developments. *Nucleic Acids Res* 47:W256–W25.
- 530 47. Bagdasarian M, Lurz R, Rückert B, Franklin FCH, Bagdasarian MM, Frey J, Timmis KN. 1981.  
531 Specific-purpose plasmid cloning vectors II. Broad host range, high copy number, RSF 1010-  
532 derived vectors, and a host-vector system for gene cloning in *Pseudomonas*. *Gene* 16:237–  
533 247.
- 534 48. Boyer HW, Roulland-dussoix D. 1969. A complementation analysis of the restriction and  
535 modification of DNA in *Escherichia coli*. *J Mol Biol* 41:459–472.
- 536 49. Studier FW, Moffatt BA. 1986. Use of bacteriophage T7 RNA polymerase to direct selective  
537 high-level expression of cloned genes. *J Mol Biol* 189:113–130.
- 538 50. Herrero M, De Lorenzo V, Timmis KN. 1990. Transposon vectors containing non-antibiotic  
539 resistance selection markers for cloning and stable chromosomal insertion of foreign genes in  
540 gram-negative bacteria. *J Bacteriol* 172:6557–6567.
- 541 51. Figurski DH, Helinski DR. 1979. Replication of an origin-containing derivative of plasmid RK2  
542 dependent on a plasmid function provided in trans. *Proc Natl Acad Sci* 76:1648–1652.



- 543 52. Choi K-H, Gaynor JB, White KG, Lopez C, Bosio CM, Karkhoff-Schweizer RR, Schweizer HP.  
544 2005. A Tn7-based broad-range bacterial cloning and expression system. *Nat Methods* 2:443–  
545 448.  
546  
547

548 **Table 1. Strains and plasmids used in this paper**

| Strain                                 | Characteristics                                                                                                                                                                                                          | References      |
|----------------------------------------|--------------------------------------------------------------------------------------------------------------------------------------------------------------------------------------------------------------------------|-----------------|
| <i>P. putida</i> S12                   | Wild type <i>P. putida</i> S12 (ATCC 700801), harboring megaplasmid pTTS12                                                                                                                                               | (3)             |
| <i>P. putida</i> S12-1                 | <i>P. putida</i> S12, harboring megaplasmid pTTS12 with Km <sup>R</sup> marker                                                                                                                                           | This paper      |
| <i>P. putida</i> S12-6/ S12-10/ S12-22 | ΔpTTS12                                                                                                                                                                                                                  | This paper      |
| <i>P. putida</i> S12-9                 | ΔpTTS12, Gm <sup>R</sup> <i>srpRSABC::Tn7</i> , complemented with megaplasmid pTTS12 (Tc <sup>R</sup> :: <i>srpABC</i> )                                                                                                 | This paper      |
| <i>P. putida</i> S12-C                 | <i>P. putida</i> ΔpTTS12 (S12-6/ S12-10/ S12-22), complemented with megaplasmid pTTS12                                                                                                                                   | This paper      |
| <i>P. putida</i> KT2440                | Derived from wildtype <i>P. putida</i> mt-2, ΔpWW0                                                                                                                                                                       | (47)            |
| <i>E. coli</i> HB101                   | <i>recA pro leu hsdR Sm<sup>R</sup></i>                                                                                                                                                                                  | (48)            |
| <i>E. coli</i> BL21(DE3)               | <i>E. coli</i> B, F <sup>-</sup> <i>ompT gal dcm lon hsdS<sub>B</sub>(r<sub>B</sub><sup>-</sup>m<sub>B</sub><sup>-</sup>) λ(DE3 [lacI lacUV5-T7p07 ind1 sam7 nin5]) [malB<sup>+</sup>]<sub>K-12</sub>(λ<sup>S</sup>)</i> | (49)            |
| <i>E. coli</i> DH5α λpir               | <i>sup E44, ΔlacU169 (ΦlacZΔM15), recA1, endA1, hsdR17, thi-1, gyrA96, relA1, λpir</i> phage lysogen                                                                                                                     | (50)            |
| <i>E. coli</i> TG1                     | <i>E. coli</i> K-12, <i>glnV44 thi-1 Δ(lac-proAB) Δ(mcrB-hsdSM)5(r<sub>K</sub><sup>-</sup>m<sub>K</sub><sup>-</sup>) F' [traD36 proAB<sup>+</sup> lacI<sup>q</sup> lacZΔM15]</i>                                         | Lucigen         |
| <i>E. coli</i> WM3064                  | <i>thrB1004 pro thi rpsL hsdS lacZΔM15 RP4-1360 Δ(araBAD)567 ΔdapA1341::[erm pir]</i>                                                                                                                                    | William Metcalf |
| <b>Plasmid</b>                         |                                                                                                                                                                                                                          |                 |
| pRK2013                                | RK2-Tra <sup>+</sup> , RK2-Mob <sup>+</sup> , Km <sup>R</sup> , <i>ori</i> ColE1                                                                                                                                         | (51)            |
| pEMG                                   | Km <sup>R</sup> , Ap <sup>R</sup> , <i>ori</i> R6K, <i>lacZα</i> MCS flanked by two I-SceI sites                                                                                                                         | (36)            |
| pEMG-Δ <i>srpABC</i>                   | pEMG plasmid for constructing <i>P. putida</i> S12 Δ <i>srpABC</i>                                                                                                                                                       | This paper      |
| pEMG-Δ <i>slvAT</i>                    | pEMG plasmid for constructing <i>P. putida</i> S12 Δ <i>slvAT</i>                                                                                                                                                        | This paper      |
| pEMG-Δ <i>slvT</i>                     | pEMG plasmid for constructing <i>P. putida</i> S12 Δ <i>slvT</i>                                                                                                                                                         | This paper      |
| pSW-2                                  | Gm <sup>R</sup> , <i>ori</i> RK2, <i>xyIS</i> , Pm → I-sceI                                                                                                                                                              | (36)            |
| pBG35                                  | Km <sup>R</sup> , Gm <sup>R</sup> , <i>ori</i> R6K, pBG-derived                                                                                                                                                          | (45)            |
| pBG-srp                                | Km <sup>R</sup> , Gm <sup>R</sup> , <i>ori</i> R6K, pBG-derived, contains <i>srp</i> operon (RPPX_27995-27965)                                                                                                           | This paper      |
| pBG-slv                                | Km <sup>R</sup> , Gm <sup>R</sup> , <i>ori</i> R6K, pBG-derived, contains <i>slv</i> gene pair (RPPX_26255-26260)                                                                                                        | This paper      |
| pBG-srp-slv                            | Km <sup>R</sup> , Gm <sup>R</sup> , <i>ori</i> R6K, pBG-derived, contains <i>slv</i> gene pair (RPPX_26255-26260) and <i>srp</i> operon (RPPX_27995-27965)                                                               | This paper      |
| pBAD18-slvT                            | Ap <sup>R</sup> , <i>ara</i> operon, contains <i>slvT</i> (RPPX_26260)                                                                                                                                                   | This paper      |

|            |                                                                 |            |
|------------|-----------------------------------------------------------------|------------|
| pUK21-slvA | Km <sup>R</sup> , lac operon, contains <i>slvA</i> (RPPX_26255) | This paper |
| pTnS-1     | Ap <sup>R</sup> , <i>ori</i> R6K, TnSABC+D operon               | (52)       |

549

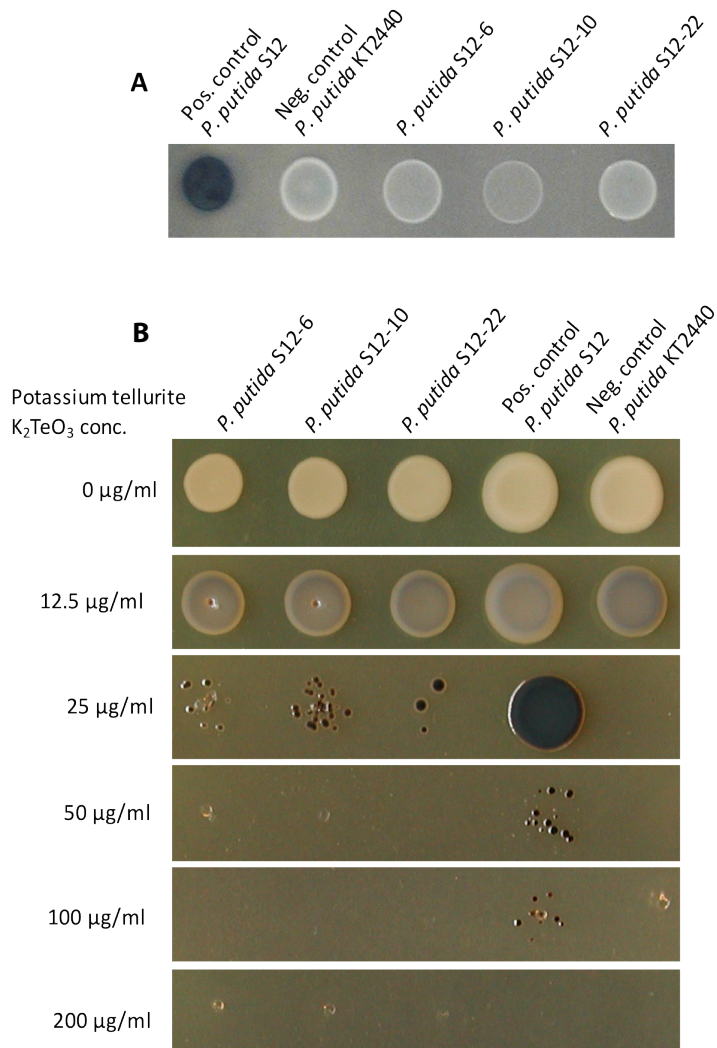

550

551 **Figure 1. Curing of the megaplasmid pTTS12 from *P. putida* S12.**

552 A. Activity of styrene monooxygenase (SMO) and styrene oxide isomerase (SOI) for indigo formation  
553 from indole in *P. putida* strains. Enzyme activity was lost in the megaplasmid-cured strains S12  
554  $\Delta pTTS12$  (white colonies). Indole ( $100 \text{ mg L}^{-1}$ ) was supplemented in M9 minimum media.

555 B.  $K_2TeO_3$  resistance of *P. putida* strains on lysogeny broth (LB) agar. Tellurite resistance was reduced  
556 in the megaplasmid-cured strains S12  $\Delta pTTS12$  (MIC  $50 \text{ mg L}^{-1}$ ).

557

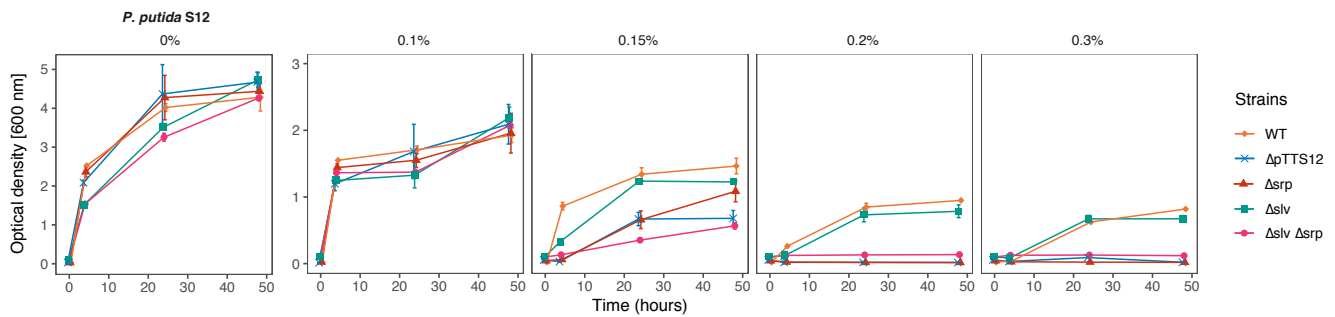

558

559 **Figure 2. Megaplasmid pTTS12 determines the solvent tolerance trait of *P. putida* S12.**

560 Solvent tolerance analysis was performed on wildtype *P. putida* S12, *P. putida* S12  $\Delta pTTS12$ , *P. putida*

561 S12  $\Delta srp$ , *P. putida* S12  $\Delta slv$ , and *P. putida* S12  $\Delta srp \Delta slv$  growing in liquid LB media with 0, 0.10, 0.15,

562 0.20 and 0.30 % v/v toluene. The removal of the megaplasmid pTTS12 clearly caused a significant

563 reduction in the solvent tolerance of *P. putida* S12  $\Delta pTTS12$ . Deletion of *srpABC* ( $\Delta srp$ ), RPPX\_26255-

564 26260 ( $\Delta slv$ ), and the combination of these gene clusters ( $\Delta srp \Delta slv$ ) resulted in a lower solvent

565 tolerance. This figure displays the mean of three biological replicates and error bars indicate standard

566 deviation. The range of y-axis is different in the first panel (0 - 5) than the rest of the panels (0 - 3).

567

568

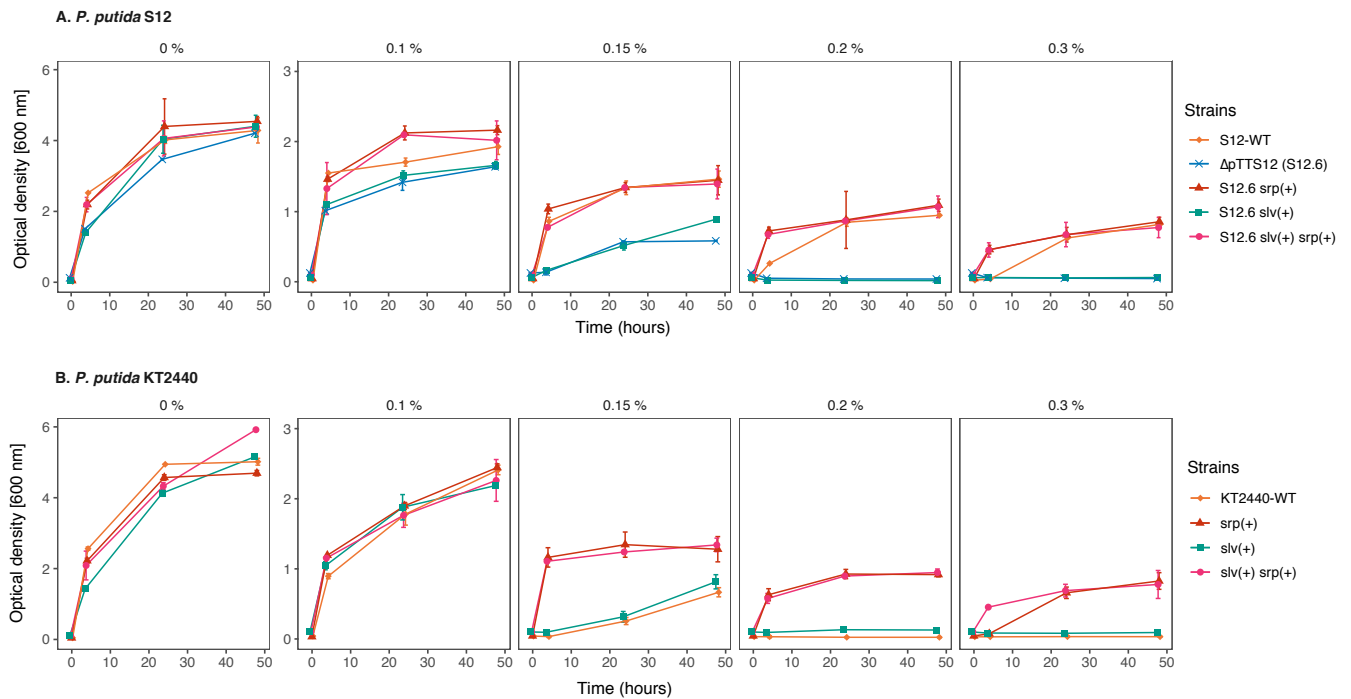

569

570 **Figure 3. Chromosomal introduction of *srp* and *slv* gene clusters increased solvent tolerance in *P.***

571 ***putida* strains.**

572 Solvent tolerance analysis of the strains with chromosomal introduction of *srp* operon (*srpRSABC*), *slv*

573 gene pair (RPPX\_26255-26260) and the combination of these gene clusters into *P. putida* S12

574  $\Delta$ pTTS12/S12.6 (A) and wildtype *P. putida* KT2440 (B) in liquid LB with 0, 0.10, 0.15, 0.20 and 0.30 %

575 v/v of toluene. Wildtype *P. putida* S12 was taken as a solvent tolerant control strain. This figure

576 displays the mean of three independent replicates and error bars indicate standard deviation. The

577 range of y-axis is different in the first panel (0 - 6) than the rest of the panels (0 - 3).

578

579

580

581

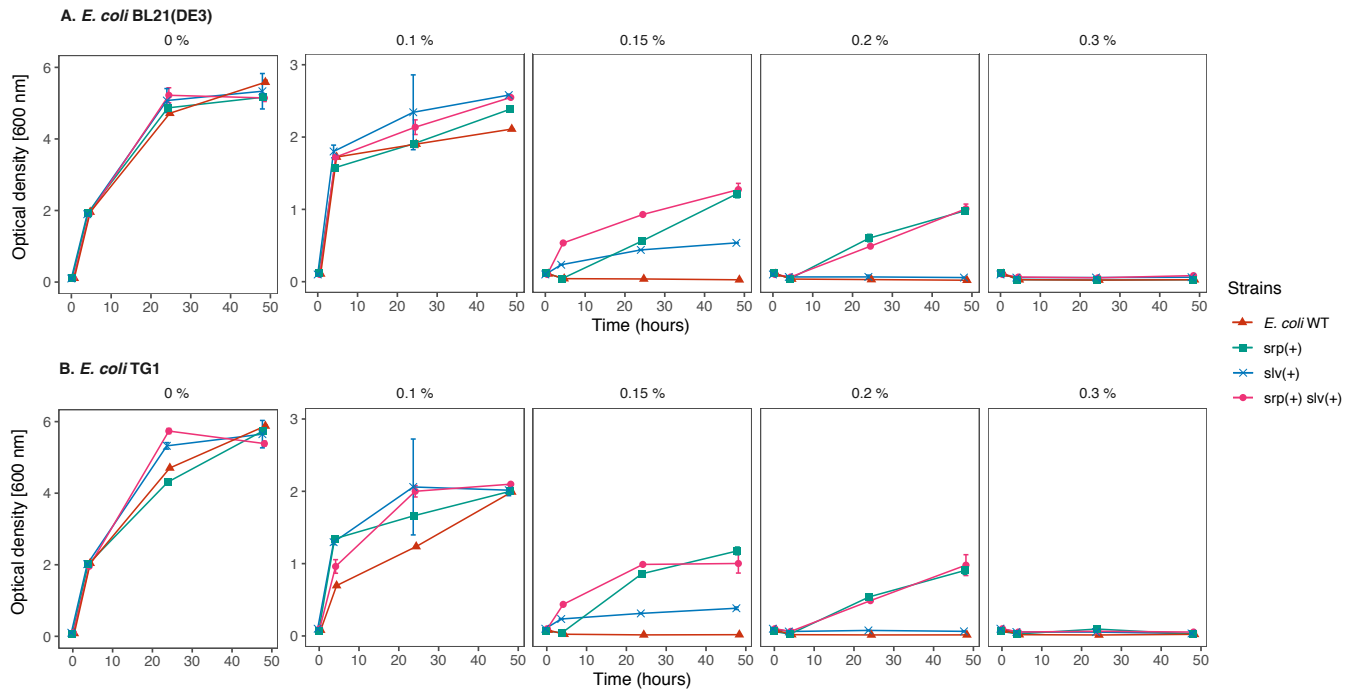

582

583 **Figure 4. Chromosomal introduction of *srp* and *slv* gene clusters increased solvent tolerance in *E.***

584 ***coli* strains.**

585 Solvent tolerance analysis of the strains with chromosomal introduction of *srp* operon (*srpRSABC*), *slv*

586 gene pair (RPPX\_26255-26260) and the combination of these gene clusters into *E. coli* BL21(DE3) (A)

587 and *E. coli* TG1 (B) in liquid LB with 0, 0.10, 0.15, 0.20 and 0.30 % v/v of toluene. This figure displays

588 the mean of three independent replicates and error bars indicate standard deviation. The range of y-

589 axis is different in the first panel (0 - 6) than the rest of the panels (0 - 3).

590

591

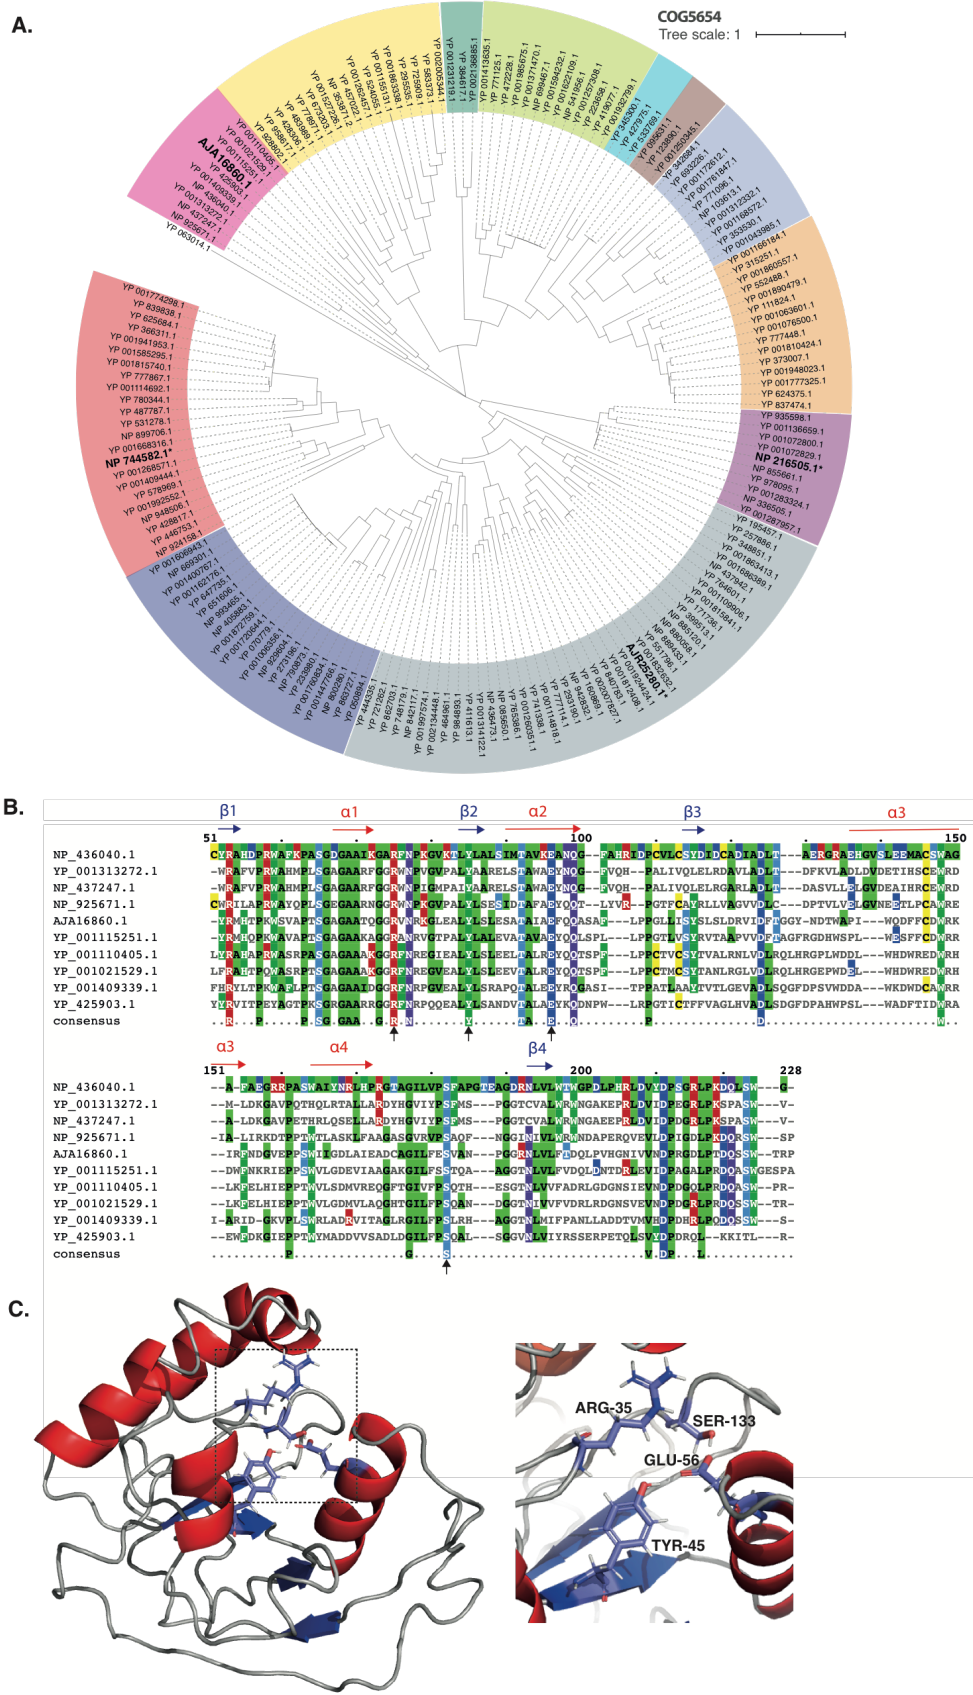

592  
593

Figure 5. Bioinformatics analysis of SlvT as a member of COG5654 toxin family

594



595 A. Phylogenetic tree (neighbour joining tree with 100 bootstrap) of COG5654 family toxin from  
596 reference sequences identified by Makarova and colleagues (29). Different colours correspond to the  
597 different toxin-antitoxin module clades. Asterisks (\*) and bold text indicate the characterized toxin  
598 proteins : ParT from *Sphingobium sp.* YBL2 (AJR25280.1), PP\_2434 from *P. putida* KT2440  
599 (NP\_744582.1), MbcT from *Mycobacterium tuberculosis* H37Rv (NP\_216505.1), and SlvT from *P.*  
600 *putida* S12 (AJA16860.1).

601

602 B. Multiple sequence alignment of the COG5654 toxin SlvT from *P. putida* S12 with several putative  
603 COG5654 family toxin protein which belong in the same clade. Putative active site residues are  
604 indicated by black arrows.

605

606 C. Protein structure modelling of SlvT using I-TASSER server (30) which exhibits high structural  
607 similarity with MbcT from *Mycobacterium tuberculosis* H37Rv. Shown are the close up of putative  
608 active site of SlvT toxin (Arg-35, Tyr-45, Glu-56, and Ser-133).

609

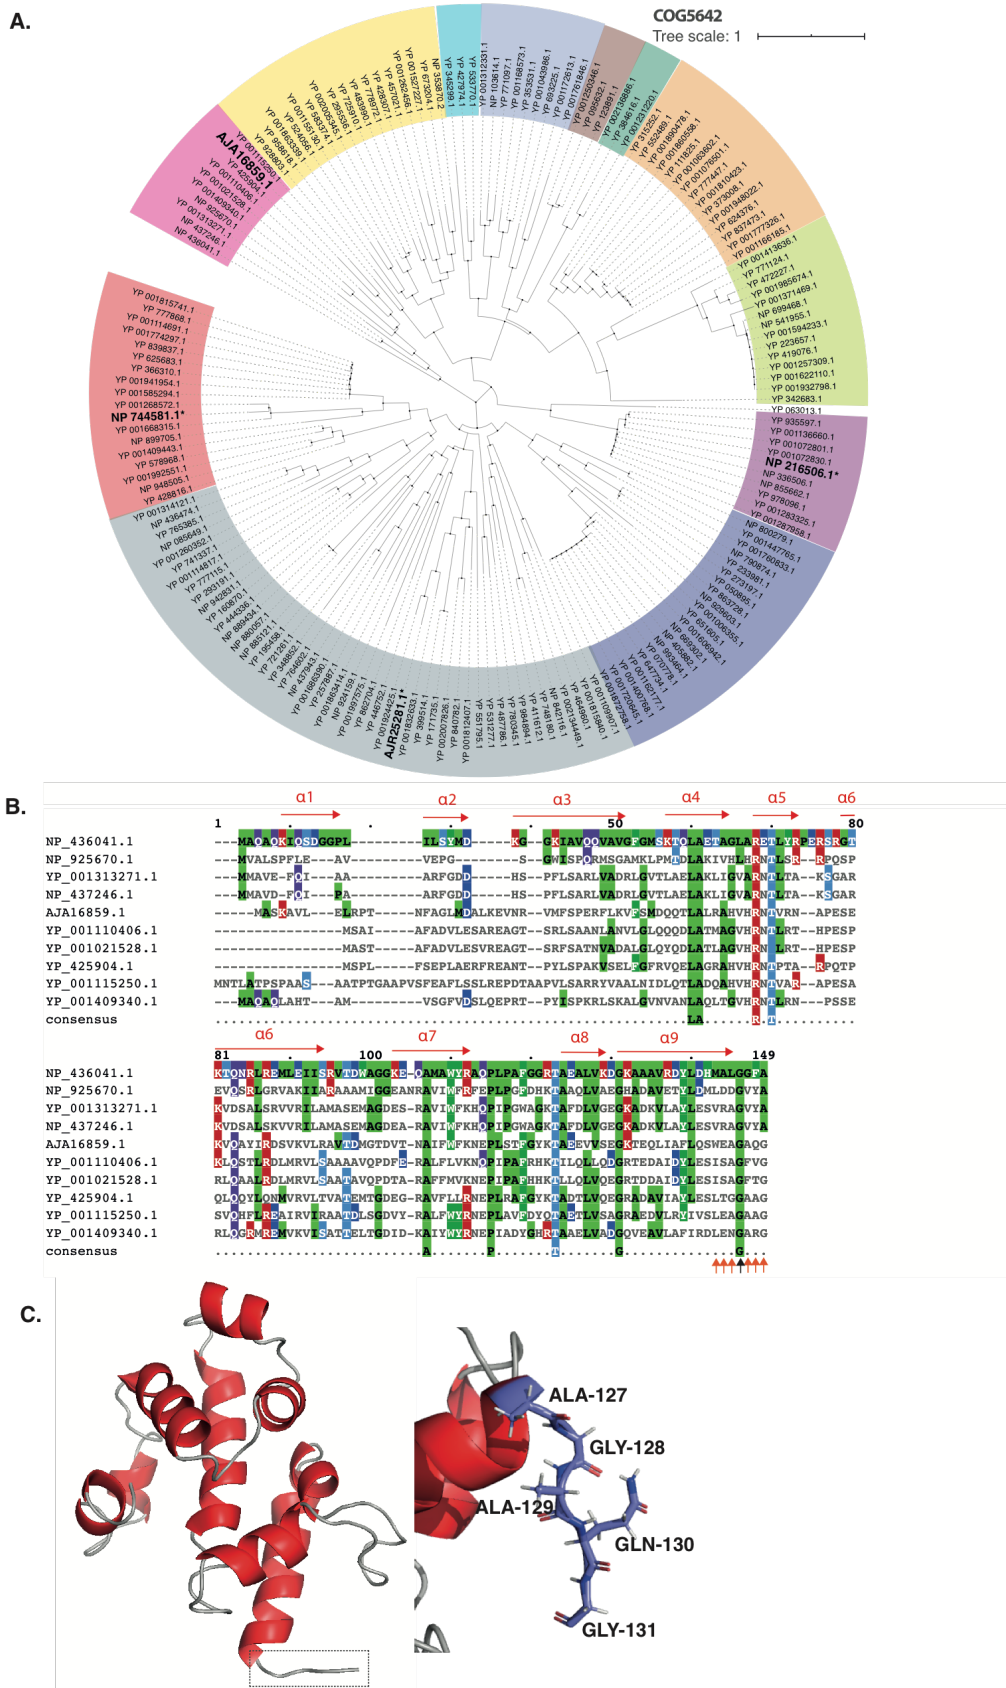

610

611

Figure 6. Bioinformatics analysis of SlvA as a member of COG5642 toxin family

612

613 A. Phylogenetic tree (neighbour joining tree with 100 bootstrap) of COG5642 family toxin from  
614 reference sequences identified by Makarova and colleagues (29). Different colours correspond to the  
615 different toxin-antitoxin module clades. Asterisks (\*) and bold text indicate the characterized toxin  
616 proteins : ParS from *Sphingobium* sp. YBL2 (AJR25281.1), PP\_2433 from *P. putida* KT2440  
617 (NP\_744581.1), MbcA from *Mycobacterium tuberculosis* H37Rv (NP\_216506.1), and SlvA from *P.*  
618 *putida* S12 (AJA16859.1).

619

620 B. Multiple sequence alignment of the COG5654 toxin SlvA from *P. putida* S12 with several putative  
621 COG5642 family toxin protein which belong in the same clade. Putative active site residues are  
622 indicated by orange and black arrows.

623

624 C. Protein structure modelling of SlvA using I-TASSER server (30) which exhibits high structural  
625 similarity with MbcA from *Mycobacterium tuberculosis* H37Rv. Shown are the close up of antitoxin  
626 putative C-terminal binding site to block SlvT toxin active site (Ala-127, Gly-128, Ala-129, Gln-130, and  
627 Gly-131).

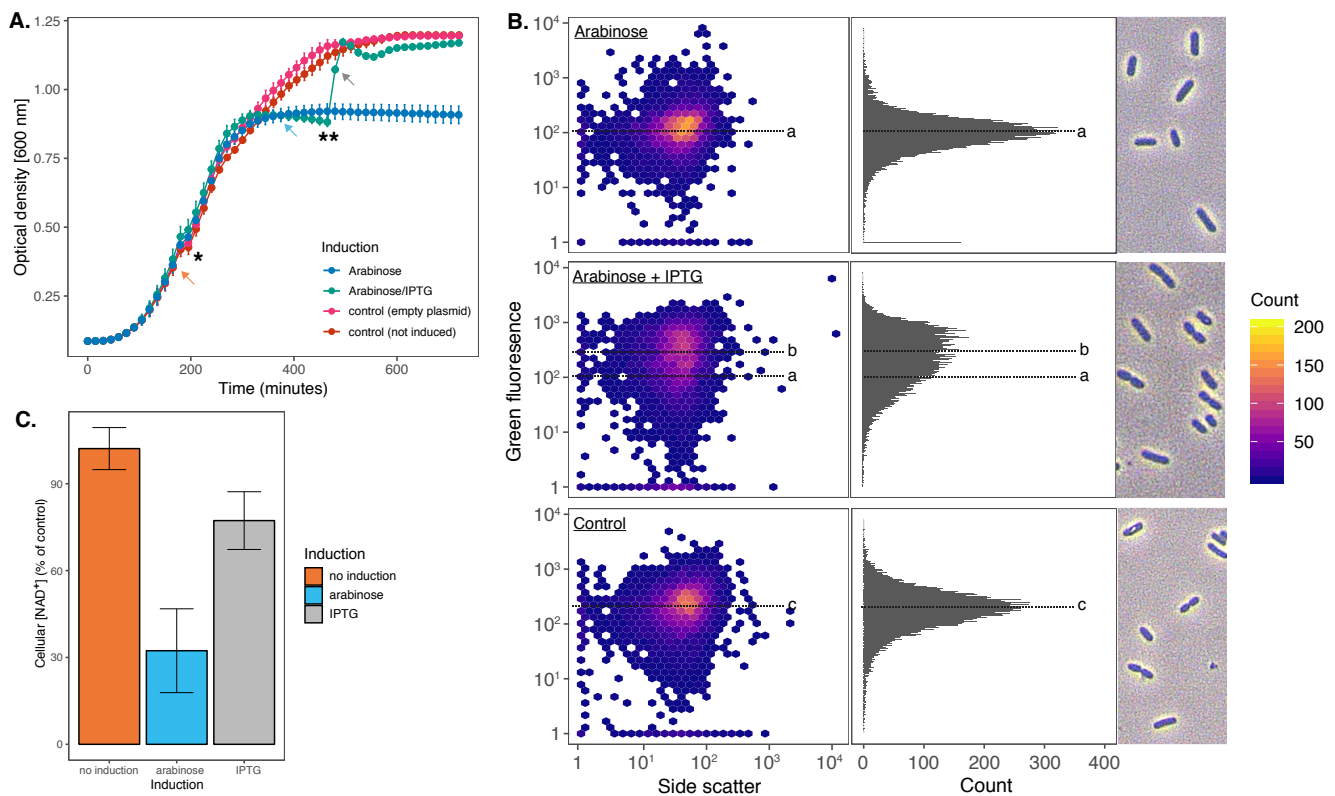

628

629 **Figure 7. Heterologous expression of SlvAT in *E. coli* BL21(DE3)**

630 A. Growth curves of *E. coli* BL21(DE3) harbouring pBAD18-slVT and pUK21-slVA showing growth  
 631 reduction after the induction of toxin by a total concentration of 0.8 % arabinose (\*) and growth  
 632 restoration after antitoxin induction by a total concentration of 2 mM IPTG (\*\*). Samples were taken  
 633 at the time points indicated by coloured arrows for cellular NAD<sup>+</sup> measurement.

634

635 B. Flow cytometry analysis of DNA content and cell morphology visualization on *E. coli* BL21(DE3)  
 636 during *slvT* and *slvAT* expression. Median value of green fluorescence representing DNA content  
 637 during *slvT* expression (118.202), *slvAT* expression (236.056), and control (208.406) are indicated by  
 638 a, b, and c respectively. Samples were taken at the time point indicated by grey arrow on figure 6A.

639

640 C. Cellular NAD<sup>+</sup> measurement during the expression of toxin-antitoxin module. Induction of toxin SlvT  
 641 caused a reduction in cellular NAD<sup>+</sup> level to 32.32 (±14.47) % of the control strain, while the expression  
 642 of SlvA restored cellular NAD<sup>+</sup> level to 77.27 (±9.97) % of the control strain.

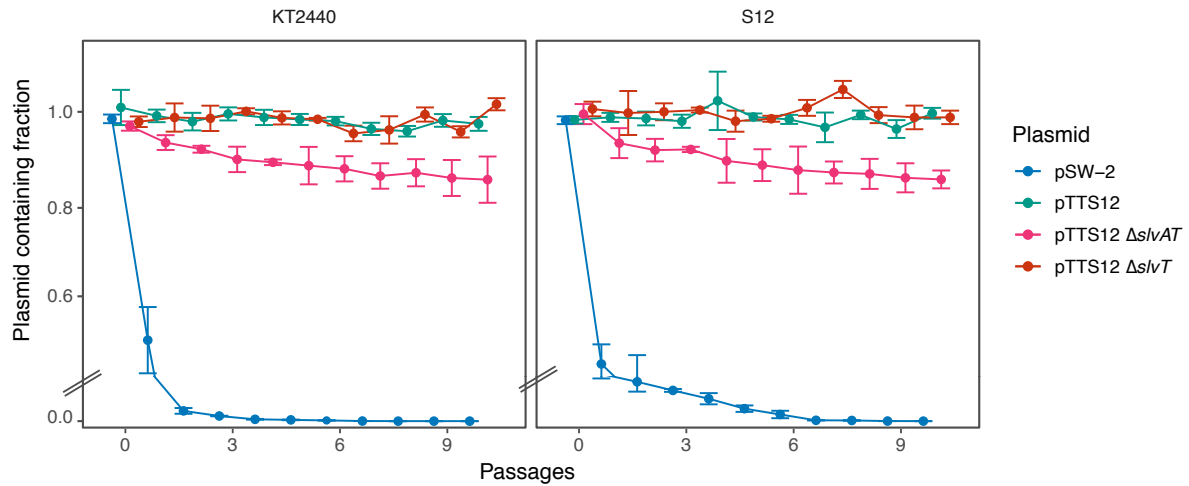

643

644 **Figure 8. SlvAT is important for pTTS12 maintenance in *P. putida*.**

645 pTTS12 (variant with Km<sup>R</sup>) maintenance in *P. putida* S12 and *P. putida* KT2440 growing in LB liquid  
646 medium without antibiotic selection for 10 passages ( $\pm$  10 generations per passage). pSW-2 was taken  
647 as negative control for plasmid stability in *P. putida*. This experiment was performed with three  
648 biological replicates and error bars represent standard deviation.

649

650

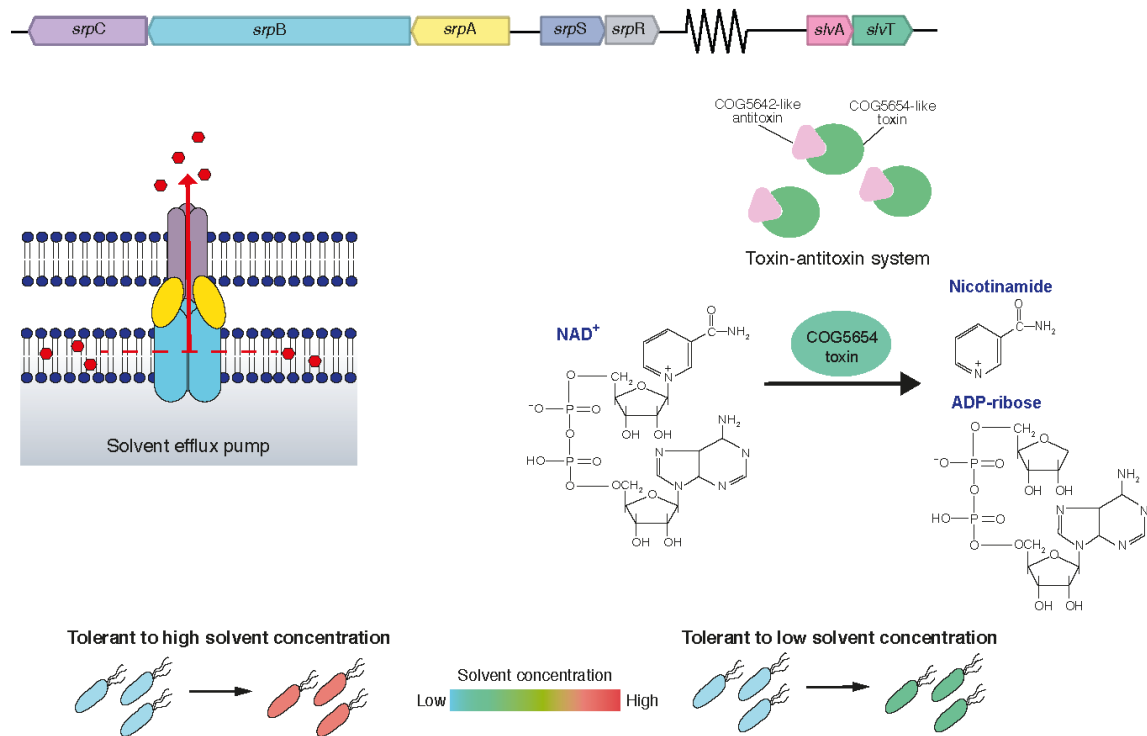

651

652 **Figure 9. Schematic representation of the genes involved in solvent tolerance from megaplasmid**

653 **pTTS12.**

654 SrpABC efflux pump is the major contributor of solvent tolerance trait from the megaplasmid pTTS12.

655 This efflux pump is able to efficiently extrude solvents from membrane lipid bilayer. A COG5654-

656 COG5642 family toxin-antitoxin system (SlvT and SlvA respectively) promoted the growth of *P. putida*

657 S12 in the presence of low solvent concentration. In the absence of SlvA, SlvT causes toxicity by

658 conferring cellular  $\text{NAD}^+$  depletion.

659

## 660 List of supplementary materials

661 **Table S1. Expression of *srpABC* genes in *P. putida* and *E. coli* strains in basal level and in the**  
662 **presence of 10 mM toluene with *gyrB* and *rpoB* as reference genes**

663

664 **Table S2. Codon adaptation index of *srp* operon in *E. coli* and *P. putida* reference strains**

665

666 **Table S3. Primers used in this paper**

667

668 **Figure S1. Removal and complementation of the megaplasmid pTTS12 from *P. putida* S12.**

669 A. The loss of the megaplasmid band in megaplasmid-cured *P. putida* S12 proven by  
670 electrophoresis of agarose embedded genomic DNA. Megaplasmid band (orange arrow) was visible  
671 in the positive control *P. putida* S12 and absent in negative control *P. putida* KT2440 and Mitomycin C  
672 treated strains (strain S12-6, S12-10, and S12-22). Blue arrow indicates bacterial chromosome.

673 B. Activity of styrene monooxygenase (SMO) and styrene oxide isomerase (SOI) for indigo  
674 formation from indole in *P. putida* strains. Enzyme activity was lost in the megaplasmid-cured strains  
675 S12  $\Delta$ pTTS12 (white colonies) and restored with the complementation of megaplasmid in the strains  
676 S12-C (blue colonies). Indole (100 mg L<sup>-1</sup>) was supplemented in M9 minimum media.

677 C. K<sub>2</sub>TeO<sub>3</sub> resistance of *P. putida* strains on lysogeny broth (LB) agar. Tellurite resistance was  
678 reduced in the megaplasmid-cured strains S12  $\Delta$ pTTS12 (MIC 50 mg L<sup>-1</sup>) and restored with the  
679 complementation of megaplasmid in the strains S12-C (MIC 200 mg L<sup>-1</sup>).

680 D. Solvent tolerance analysis was performed on *P. putida* S12, *P. putida* S12  $\Delta$ pTTS12, and *P.*  
681 *putida* S12-C growing in liquid LB media with 0, 0.10, 0.15, 0.20 and 0.30 % v/v toluene. The removal  
682 of the megaplasmid pTTS12 clearly caused a significant reduction in the solvent tolerance of *P. putida*

683 S12  $\Delta$ pTTS12. Complementation of pTTS12 restores the solvent tolerance trait in *P. putida* S12-C. This  
684 figure displays the mean of three independent replicates and error bars indicate standard deviation.  
685 The range of y-axis is different in the first panel (0 - 6) than the rest of the panels (0 - 2.5).

686

687 **Figure S2. Metabolic burden of megaplasmid pTTS12 during growth in the presence of organic**  
688 **solvent.**

689 Solvent tolerance was compared between *P. putida* S12, *P. putida* S12-6.1 (S12-6 *srp::attn7*), and *P.*  
690 *putida* S12-9 (S12-6 *srp::attn7*, pTTS12 *tet::srp*) in liquid LB media with 0, 0.10, 0.15, and 0.20 % v/v  
691 toluene. This figure displays the mean of three independent replicates and error bars indicate  
692 standard deviation. The range of y-axis is different in the first panel (0 - 6) than the rest of the panels  
693 (0 - 2.5).

694

695 **Figure S3. Multiple alignment of SlvT and SlvA with characterized toxin-antitoxin of COG5654-**  
696 **COG5642 family**

697 Sequence similarity of the COG5654 toxin SlvT (A) from *P. putida* S12 and COG5642 antitoxin SlvA (B)  
698 with several characterized COG5654-COG5642 family toxin-antitoxin protein. Putative active site  
699 residues showed >70% similarities and are indicated by red arrows.

700

701

702
